# Supplementary material for: Ischaemic stroke and the recanalization drug tissue plasminogen activator interfere with antibacterial phagocyte function
Source: Springer Nature journal article supplement (doi:10.1186/s12974-017-0914-6), 2017-07-21

brightfield

Sytox stained

unstimulated

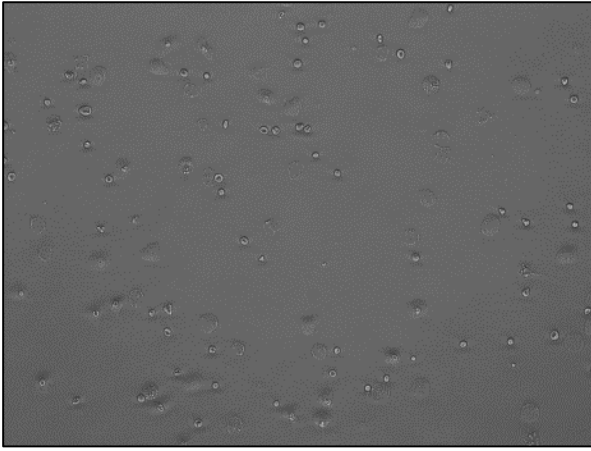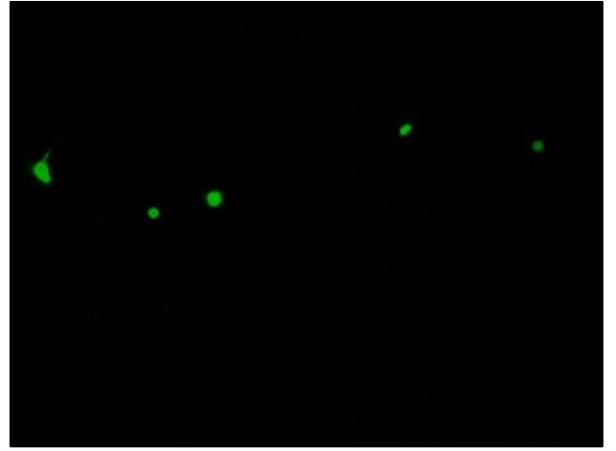

PMA stimulated

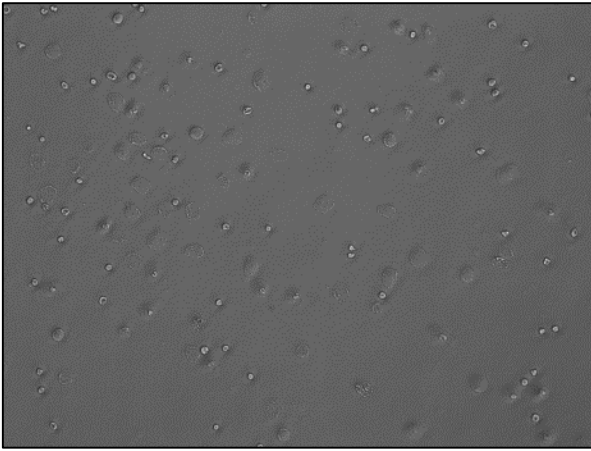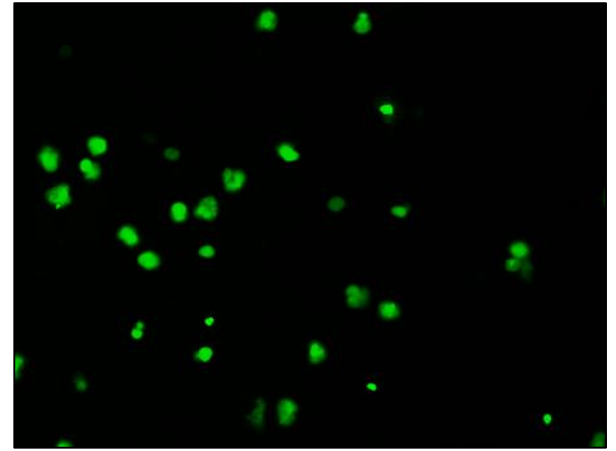

Supplement: MOESM1 [file 12974_2017_914_MOESM1_ESM.pdf]
