# Supplementary material for: Ischaemic stroke and the recanalization drug tissue plasminogen activator interfere with antibacterial phagocyte function
Source: Springer Nature journal article supplement (doi:10.1186/s12974-017-0914-6), 2017-07-21

# Additional file VI

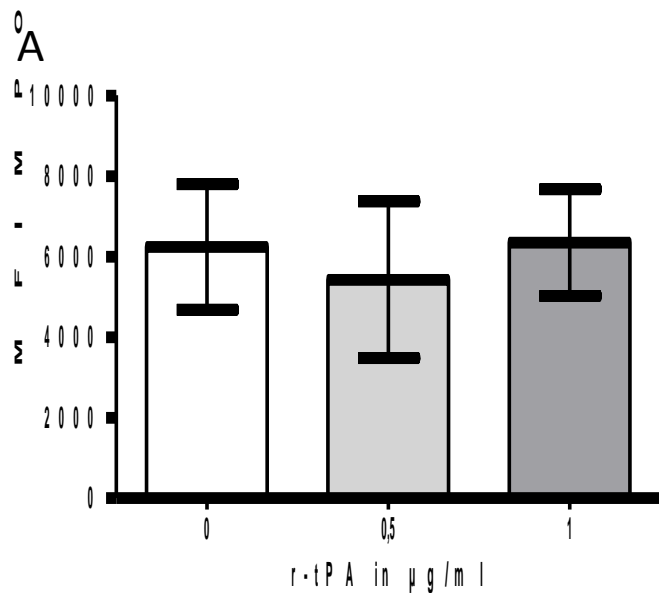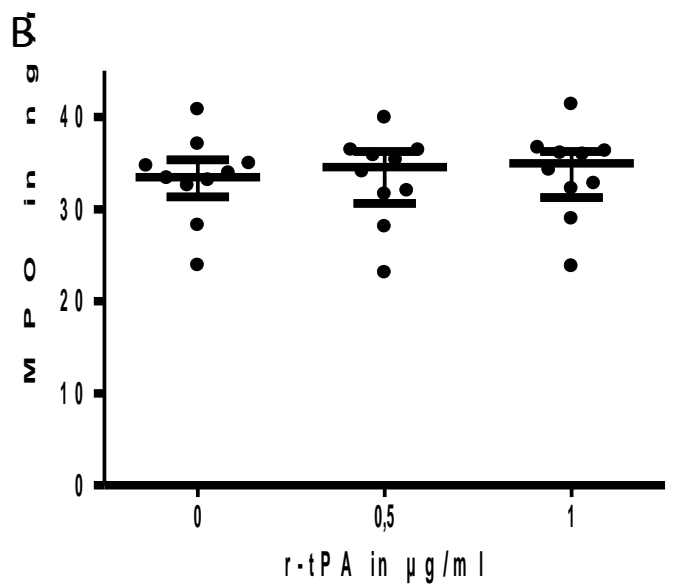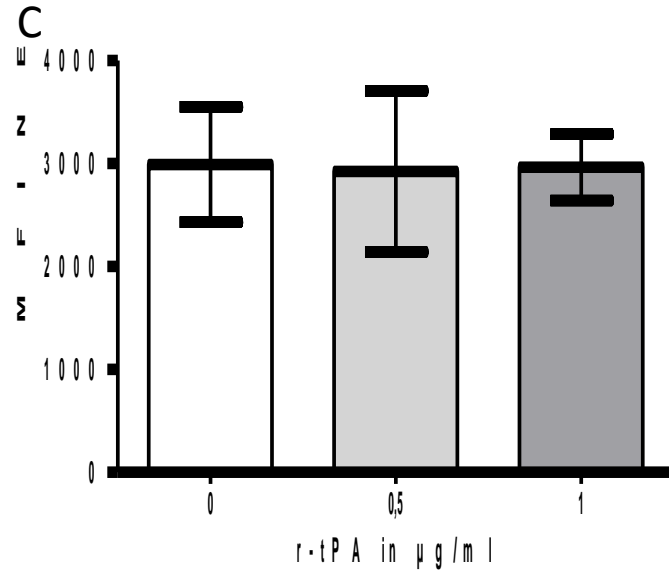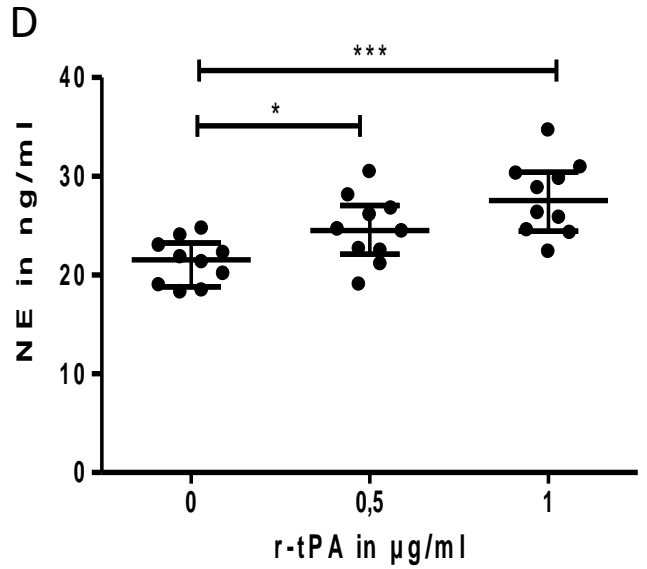

Supplement: MOESM6 [file 12974_2017_914_MOESM6_ESM.pdf]
